# Supplementary material for: The Chronic Effect of Transgenic Maize Line with mCry1Ac or maroACC Gene on Ileal Microbiota Using a Hen Model
Source: MDPI journal article supplement (doi:10.3390/microorganisms7030092), 2019-03-24
Supplement: s1 [file s1]

## Supplementary Table

**Table S1. Ingredient and analyzed nutrient composition (as-fed basis) of diets.**

| Item                          | Diet <sup>a</sup> |       |       |
|-------------------------------|-------------------|-------|-------|
|                               | CT                | BT    | CC    |
| Ingredient, g/kg              |                   |       |       |
| Corn                          | 617.0             | 617.0 | 617.0 |
| Nontransgenic soybean meal    | 262.0             | 262.0 | 262.0 |
| Limestone                     | 81.0              | 81.0  | 81.0  |
| Dicalcium phosphate           | 15.1              | 15.1  | 15.1  |
| Non transgenic soybean oil    | 10.0              | 10.0  | 10.0  |
| Methionine                    | 3.0               | 3.0   | 3.0   |
| Salt                          | 1.0               | 1.0   | 1.0   |
| Choline chloride              | 1.0               | 1.0   | 1.0   |
| Premix <sup>b</sup>           | 10.0              | 10.0  | 10.0  |
| Analyzed nutrient composition |                   |       |       |
| Dry matter                    | 922.2             | 912.2 | 907.3 |
| Crude protein                 | 168               | 167   | 165   |
| Ether extract                 | 32                | 32    | 33    |
| Ash                           | 135               | 131   | 136   |
| Starch                        | 382               | 383   | 382   |
| Neutral detergent fiber       | 65                | 69    | 69    |
| Acid detergent fiber          | 23                | 23    | 21    |
| Calcium                       | 41.7              | 40.3  | 41.4  |
| Total phosphorus              | 5.3               | 4.6   | 4.5   |
| Gross energy, kcal/kg         | 3,584             | 3,630 | 3,574 |
| Indispensable amino acid      |                   |       |       |
| Arginine                      | 11                | 11    | 11    |
| Histidine                     | 5.0               | 5.2   | 5.0   |
| Isoleucine                    | 6.8               | 7.2   | 6.5   |
| Leucine                       | 14.3              | 14.0  | 13.9  |
| Lysine                        | 9.0               | 9.1   | 8.7   |
| Methionine                    | 3.6               | 3.1   | 2.9   |
| Phenylalanine                 | 8.3               | 8.5   | 8.2   |
| Threonine                     | 6.4               | 6.6   | 6.5   |
| Valine                        | 7.9               | 7.9   | 7.5   |
| Dispensable amino acid        |                   |       |       |
| Alanine                       | 8.4               | 8.9   | 8.8   |
| Aspartic acid                 | 16.2              | 16.4  | 16.1  |
| Cysteine                      | 2.4               | 2.3   | 2.3   |
| Glutamic acid                 | 28.8              | 29.8  | 29.6  |
| Glycine                       | 6.8               | 7.0   | 6.7   |
| Proline                       | 9.7               | 10.0  | 10.2  |
| Serine                        | 7.8               | 8.5   | 8.5   |
| Tyrosine                      | 6.5               | 6.8   | 6.7   |

<sup>a</sup>CT: nontransgenic near-isoline corn, BT: transgenic corn produced by the insertion of the *mCryIAc* gene derived from *Bacillus thuringiensis* strain, and CC: transgenic corn produced by the insertion of the *maroACC* gene derived from *Agrobacterium tumefaciens* strain.

<sup>b</sup>Provided per kilogram of diet: vitamin A, 12,500 IU; vitamin D<sub>3</sub>, 4,125 IU; vitamin E, 15 IU; vitamin K, 2 mg; thiamine, 1 mg; riboflavin, 8.5 mg; calcium pantothenate, 50 mg; niacin, 32.5 mg; pyridoxine, 8 mg; biotin, 2 mg; folic acid, 5 mg; vitamin B<sub>12</sub>, 5 mg; manganese, 80 mg; iodine, 1 mg; iron, 60 mg; copper, 8 mg; zinc, 80 mg; selenium, 0.3 mg.
